# Supplementary material for: The role of [18F]F-DOPA PET/CT in diagnostic and prognostic assessment of medullary thyroid cancer: a 15-year experience with 109 patients
Source: PubMed Central journal article supplement (PMC11301540; doi:10.1530/etj-24-0089), 2024-07-13
Supplement: supplementary_material.pdf [file supplementary_material.pdf]

# The Role of [<sup>18</sup>F]F-DOPA PET/CT in Diagnostic and Prognostic Assessment of Medullary Thyroid Cancer (MTC): A 15-Year Experience with 109 Patients

Zhang Z., Yu J., Rainer E., Hargitai L., Jiang Z., Karanikas G., Traub-Weidinger T., Crevenna R., Hacker M., Li S.

## 1. Methods

**Participants:** 109 Patients with MTC

**Intervention:** [<sup>18</sup>F]F-DOPA PET/CT ; [<sup>18</sup>F]F-DOPA PET Parameter; Basal calcitonin (bCt); Stimulated calcitonin; CEA

## 2. Results

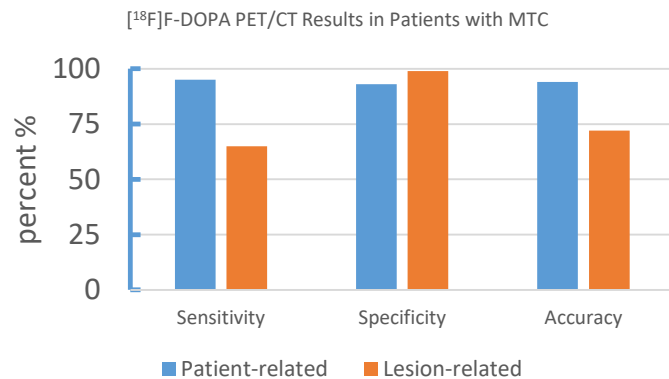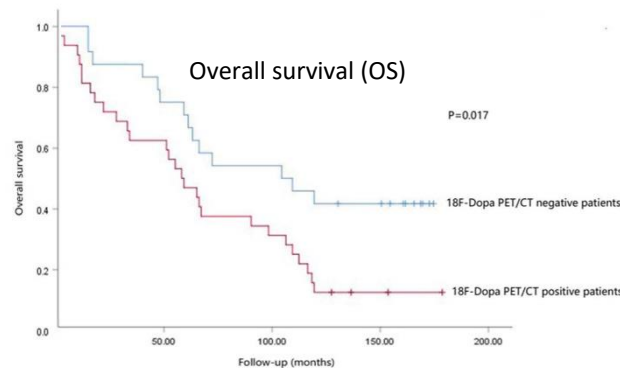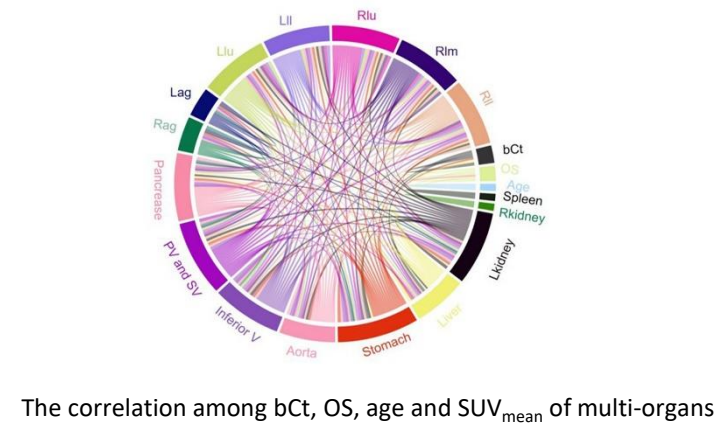

## 3. Conclusions

[<sup>18</sup>F]F-DOPA PET/CT had great value for diagnosis and prognostic assessment in patients with MTC. The DOPA PET/CT parameter  $SUV_{mean}$  and MTV showed significant association to Overall Survival (OS)
